# Supplementary material
Source: PubMed Central journal article supplement (PMC2048772)
Supplement: plntphys_pp.107.104794_1.pdf [file plntphys_pp.107.104794_1.pdf]

Figure S1

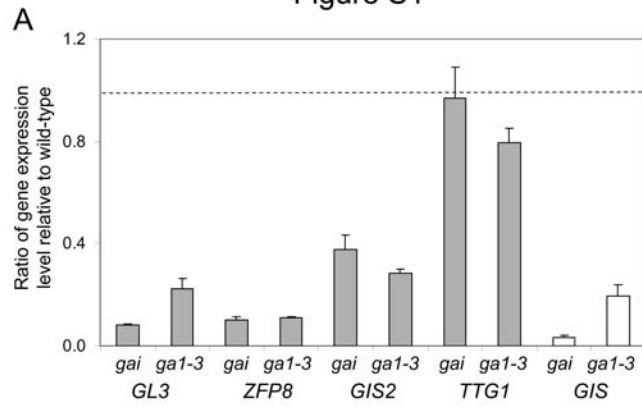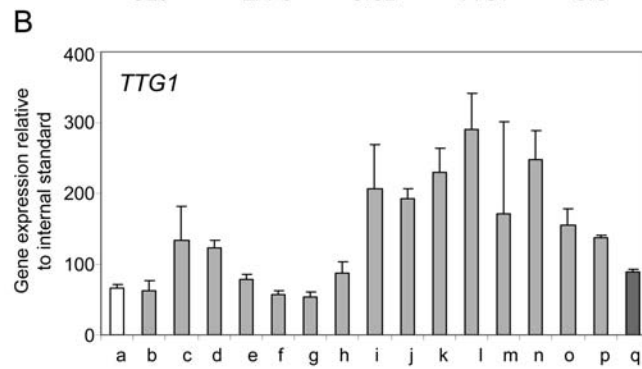

- |                                 |                                      |
|---------------------------------|--------------------------------------|
| a: <i>gai1-3</i>                | j: <i>gai1-3 rga* rgl1</i>           |
| b: <i>gai1-3 rgl1</i>           | k: <i>gai1-3 rga* rgl2</i>           |
| c: <i>gai1-3 rgl2</i>           | l: <i>gai1-3 rga* rgl1 rgl2</i>      |
| d: <i>gai1-3 rgl1 rgl2</i>      | m: <i>gai1-3 rga* gai</i>            |
| e: <i>gai1-3 gai*</i>           | n: <i>gai1-3 rga* gai* rgl1</i>      |
| f: <i>gai1-3 gai* rgl1</i>      | o: <i>gai1-3 rga* gai* rgl2</i>      |
| g: <i>gai1-3 gai* rgl2</i>      | p: <i>gai1-3 rga* gai* rgl1 rgl2</i> |
| h: <i>gai1-3 gai* rgl1 rgl2</i> | q: wild-type Ler                     |
| i: <i>gai1-3 rga*</i>           |                                      |
