# Supplementary material
Source: PubMed Central journal article supplement (PMC2048772)
Supplement: plntphys_pp.107.104794_4.pdf [file plntphys_pp.107.104794_4.pdf]

## Supplemental data

**Figure S1: Influence of GA signaling and DELLA activity on the expression of genes encoding transcriptional activators of trichome initiation**

(a) Expression of *GL3*, *ZFP8*, *GIS2*, *TTG1* and *GIS* in the *gai* and *gai-3* mutants; (b) *TTG1* expression in *gai-3* mutants in which DELLA function is impaired. Values are ratios of mutant to wild-type levels (the dotted line indicates a ratio of 1: no change). Transcript levels were measured in young developing inflorescence by real-time PCR. Values represent the average and standard deviation from three measurements and are relative the expression of the *UBQ10* gene.

**Figure S2: Effects of overexpressing *GIS* or *ZFP8* on flower trichome initiation in the *gai-3 rga-t2 gai-t6* background**

Trichome initiation on flowers of *gai-3 rga-t2 gai-t6* control (a) *35S:GIS gai-3 rga-t2 gai-t6* (b) and *35S:ZFP8 gai-3 rga-t2 gai-t6* overexpressing plants (c). *GIS* and *ZFP8* overexpression cause the proliferation of trichomes on sepals.

**Figure S3: Effect of DELLA mutations on reproductive and vegetative phase change**

Relative influence of *rga-t2*, *gai-t6*, *rgl1* and *rgl2* mutations on the flowering time (A), rate of leaf production (B) and juvenile-adult leaf transition (C) in the *gai-3* background. Mutants other than *gai-3 rga-t2* had an extreme late flowering phenotype and were not included in the analysis. The first adult leaf is the earliest

**leaf to present abaxial trichomes. *gai*\*: *gai-t6*; *rga*\*: *rga-t2*; Ler: Lansberg ecotype control. Values represent averages and standard error for 20 plants**
