# Supplementary material
Source: PubMed Central journal article supplement (PMC2048772)

Figure S2

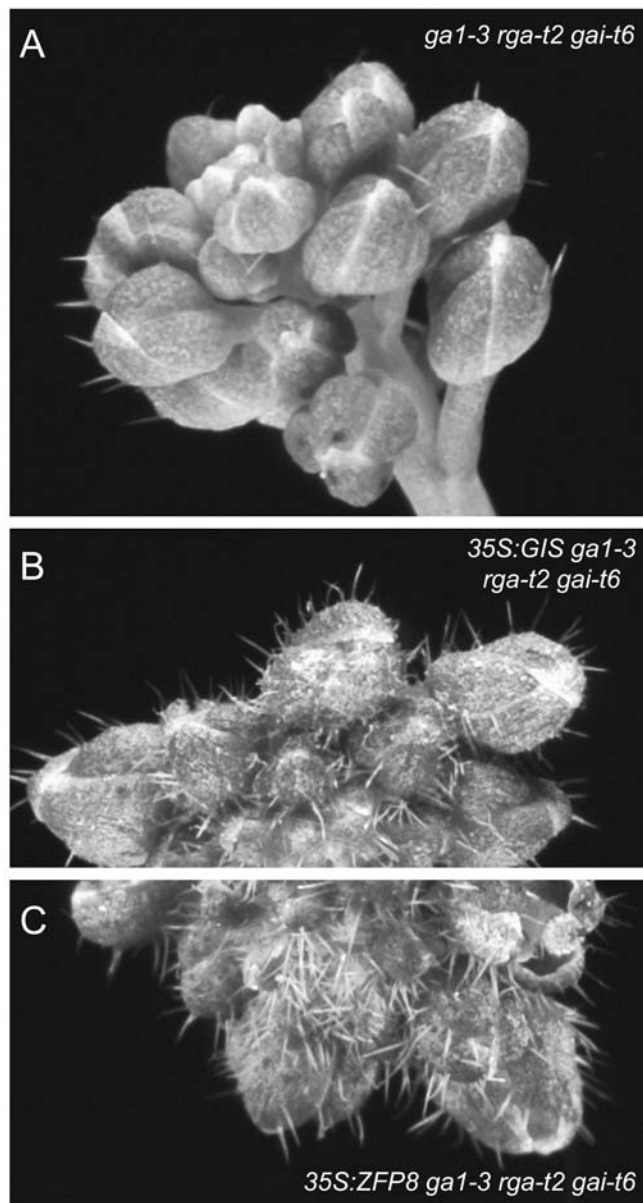

Supplement: plntphys_pp.107.104794_2.pdf [file plntphys_pp.107.104794_2.pdf]

Figure S3

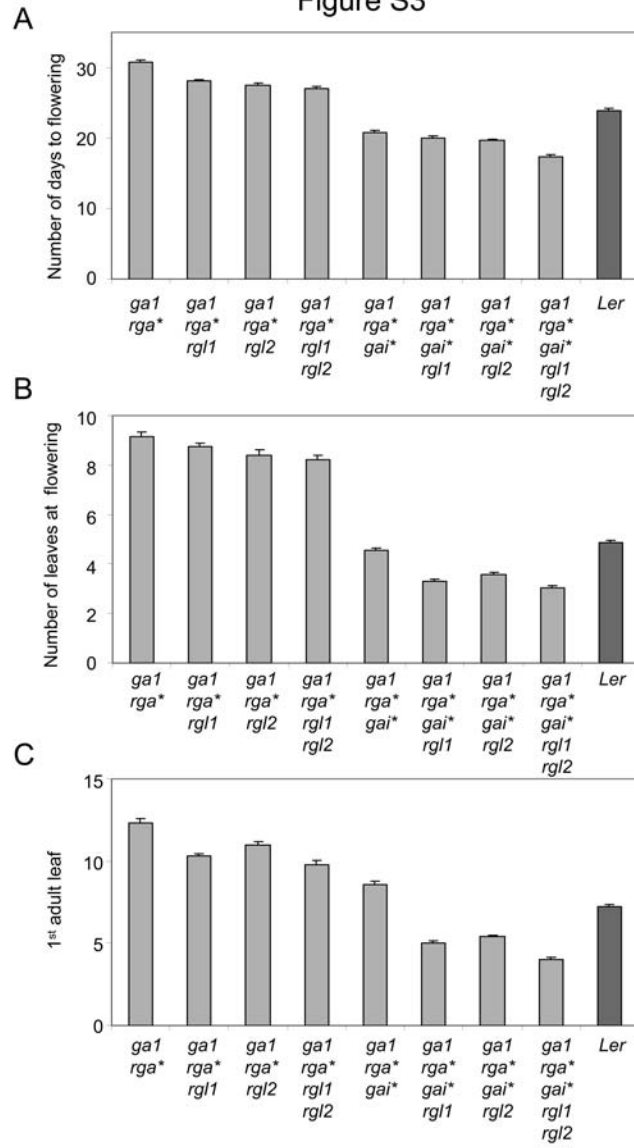

Supplement: plntphys_pp.107.104794_3.pdf [file plntphys_pp.107.104794_3.pdf]
